---

# Erratum

Gordin D, Soro-Paavonen A, Thomas MC, Harjutsalo V, Saraheimo M, Bjerre M, Forsblom C, Flyvbjerg A, Groop P-H, on behalf of the FinnDiane Study Group. Osteoprotegerin is an independent predictor of vascular events in Finnish adults with type 1 diabetes. *Diabetes Care* 2013;36:1827–1833

In Table 5 of the article listed above, the heading of the second column should be “Incident stroke” rather than “Incident CHD.” The online version reflects these changes.
